# Supplementary material for: A versatile water vapor generation module for vapor isotope calibration and liquid isotope measurements
Source: Copernicus journal article supplement (doi:10.5194/amt-2023-160), 2023-09-11
Supplement: Supplementary file [file amt-2023-160-AC4-supplement.pdf]

**Response to Reviewer 4 on review of “A versatile water vapor generation module for vapor isotope calibration and liquid isotope measurements”**

The reviewer has provided the following review. However, as our paper does not deal with any UAV systems or EC systems we believe that the review carried out by the reviewer was intended for a different manuscript. We are hence not able to respond to the reviewer.

- 1) Elucidate that what are the advantages or improvements of the UAV-based EC system developed by authors over other existing UAV-based flux measurement systems.
- 2) Show that what are the differences or improvements in the calculation method of wind or turbulent flux for the current UAV-based EC system compared with manned airborne EC systems.
- 3) Measurement precision or reliability is an important metric for the successful application of the UAV EC methods, the current manuscript only gave the mathematical precision (or instrumental error) in measurement of wind and turbulent flux. I recommend that the authors could make a direct comparison between the measurement from UAV- and ground-based EC systems.
